# Supplementary material
Source: Springer Nature journal article supplement (https://www.springermedizin.de/resource/supplementary/12985_2010_867_MOESM5_ESM.pdf/9608626)

**A**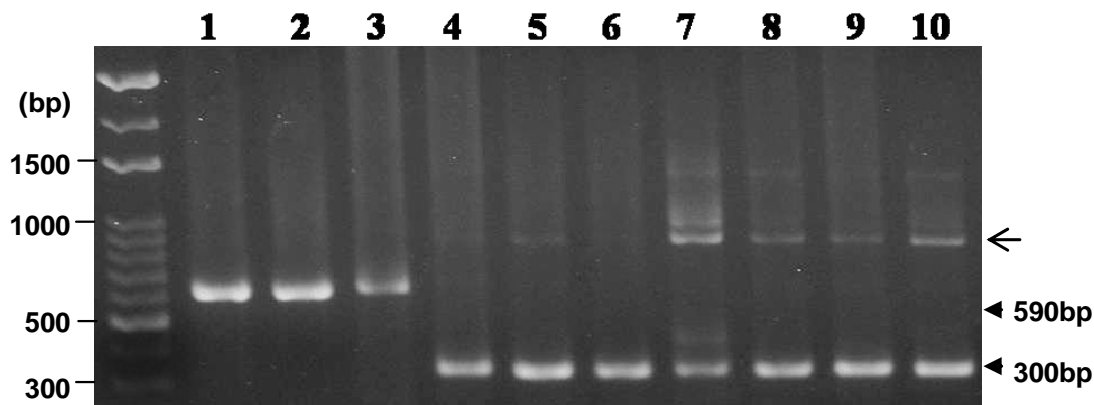**B**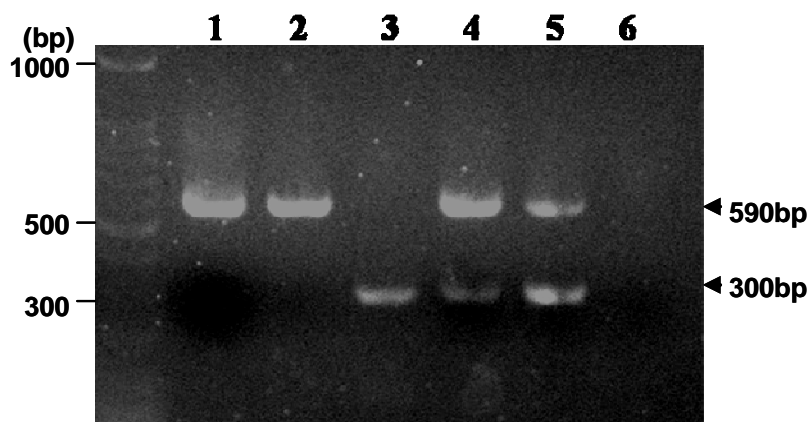**C**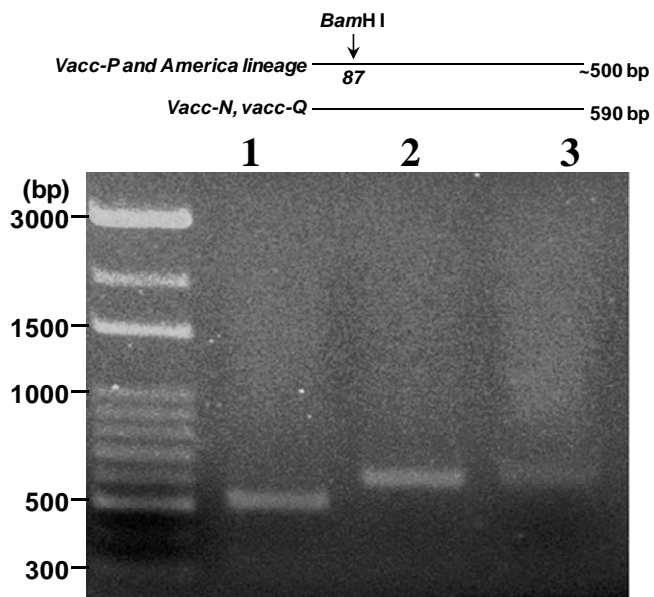

Supplement: MOESM5 [file 9608626]
